# Supplementary material
Source: PubMed Central journal article supplement (PMC3037697)
Supplement: supp_M110.161489_jbc.M110.161489-1.pdf [file supp_M110.161489_jbc.M110.161489-1.pdf]

## Supplementary Figure 1

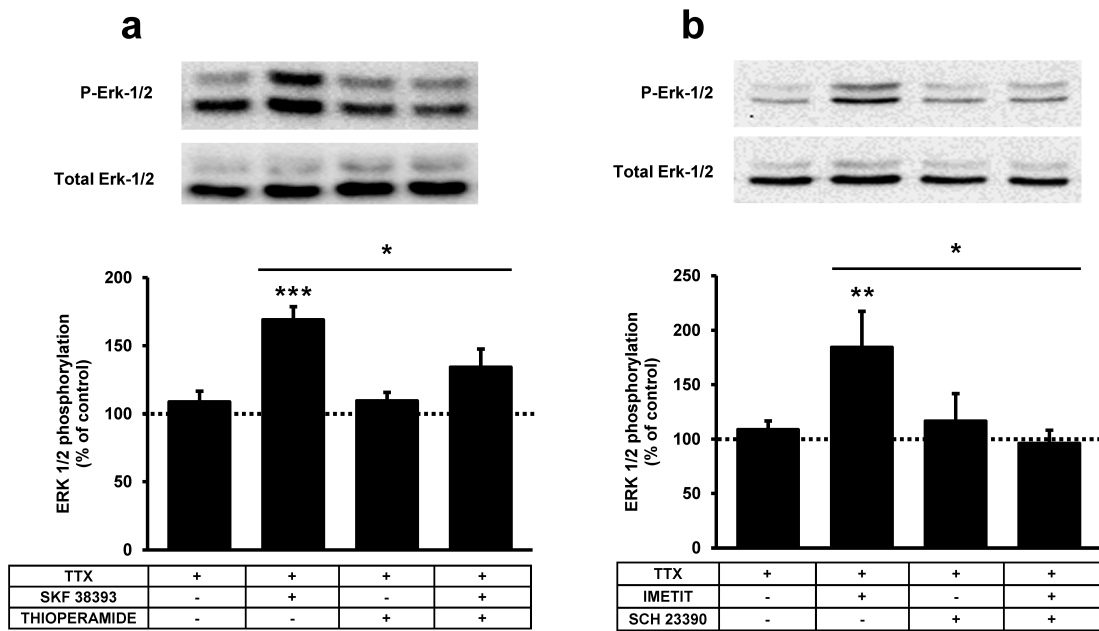

Tetrodotoxin effect on D<sub>1</sub>R or H<sub>3</sub>R agonist-mediated ERK 1/2 phosphorylation. Rat striatal slices were treated for 10 min with 1  $\mu$ M tetrodotoxin before addition of ligands. Slices were incubated in the absence or in the presence of 10  $\mu$ M thioperamide (a) or 10  $\mu$ M SCH 23390 (b) prior to the addition of medium or 1  $\mu$ M SKF 38393 (a) or 1  $\mu$ M imetit (b) and incubated further (10 min). ERK1/2 phosphorylation was determined as indicated in Materials and Methods. The immunoreactive bands from 7 to 16 (a) or 5 to 16 (b) slices obtained from 3 to 8 animals were quantified and values represent as mean  $\pm$  S.E.M. of the percentage of phosphorylation relative to basal levels found in untreated slices (100 %). Significant differences were calculated by one-way ANOVA with post-hoc Bonferroni's multiple tests (\*  $p < 0.05$ , \*\*  $p < 0.01$ , \*\*\*  $p < 0.001$ , as compared to TTX alone or as indicated by bar).
